# Supplementary material
Source: PubMed Central journal article supplement (PMC5520449)
Supplement: cdd201718x1.pdf [file cdd201718x1.pdf]

| Type of C14 peptidase | Abbreviation | Protein ID     | Protein name            | Species                 | Kingdom    | Phylum     | Class       |
|-----------------------|--------------|----------------|-------------------------|-------------------------|------------|------------|-------------|
| Initiator caspases    | HsC2         | NP_116764.2    | caspase-2               | Homo sapiens            | Animalia   | Chordata   | Mammalia    |
|                       | HsC8         | AAL87630.1     | caspase-8               | Homo sapiens            | Animalia   | Chordata   | Mammalia    |
|                       | HsC9         | AAD13615.1     | caspase-9               | Homo sapiens            | Animalia   | Chordata   | Mammalia    |
|                       | HsC10        | NP_116759.2    | caspase-10              | Homo sapiens            | Animalia   | Chordata   | Mammalia    |
|                       | DmC1         | NP_477249.3    | DREDD                   | Drosophila melanogaster | Animalia   | Arthropoda | Insecta     |
|                       | DmC2         | NP_524017.1    | DRONC                   | Drosophila melanogaster | Animalia   | Arthropoda | Insecta     |
|                       | CeC1         | AAG42045.1     | CED-3                   | Caenorhabditis elegans  | Animalia   | Nematoda   | Chromadorea |
|                       | CeC2         | AAC98292.1     | Csp-1                   | Caenorhabditis elegans  | Animalia   | Nematoda   | Chromadorea |
|                       | CeC3         | AAC98295.1     | Csp-2                   | Caenorhabditis elegans  | Animalia   | Nematoda   | Chromadorea |
| Inflammatory caspases | HsC1         | BAD97223.1     | caspase-1               | Homo sapiens            | Animalia   | Chordata   | Mammalia    |
|                       | HsC4         | NP_001216.1    | caspase-4               | Homo sapiens            | Animalia   | Chordata   | Mammalia    |
|                       | HsC5         | ABB58698.1     | caspase-5               | Homo sapiens            | Animalia   | Chordata   | Mammalia    |
| Effector caspases     | HsC3         | CAC88866.1     | caspase-3               | Homo sapiens            | Animalia   | Chordata   | Mammalia    |
|                       | HsC6         | NP_001217.2    | caspase-6               | Homo sapiens            | Animalia   | Chordata   | Mammalia    |
|                       | HsC7         | NP_203126.1    | caspase-7               | Homo sapiens            | Animalia   | Chordata   | Mammalia    |
|                       | DmC3         | NP_001260718.1 | Strica                  | Drosophila melanogaster | Animalia   | Arthropoda | Insecta     |
|                       | DmC4         | NP_476974.1    | DCP1                    | Drosophila melanogaster | Animalia   | Arthropoda | Insecta     |
|                       | DmC5         | CAA72937.1     | DRICE                   | Drosophila melanogaster | Animalia   | Arthropoda | Insecta     |
|                       | DmC6         | AAD54071.2     | Decay                   | Drosophila melanogaster | Animalia   | Arthropoda | Insecta     |
| DmC7                  | AAF82437.1   | Damm           | Drosophila melanogaster | Animalia                | Arthropoda | Insecta    |             |

|            |                     |                 |                        |                                    |                               |                 |               |                |
|------------|---------------------|-----------------|------------------------|------------------------------------|-------------------------------|-----------------|---------------|----------------|
| Caspase-14 | AmC1                | AAG02769.1      |                        | Amsacta moorei entomopoxvirus      | Viruses                       | -               | -             |                |
|            | CfaC1               | CAF04324.1      |                        | Spodoptera frugiperda ascovirus 1a | Viruses                       | -               | -             |                |
|            | CeC4                | AAC98297.1      | Csp-3                  | Caenorhabditis elegans             | Animalia                      | Nematoda        | Chromadorea   |                |
|            | HsC14               | NP_036246.1     | caspase-14             | Homo sapiens                       | Animalia                      | Chordata        | Mammalia      |                |
|            | Paracaspase type I  | HsPCP1          | NP_006776.1            | MALT1                              | Homo sapiens                  | Animalia        | Chordata      | Mammalia       |
|            |                     | CePC1           | AAG38591.1             |                                    | Caenorhabditis elegans        | Animalia        | Nematoda      | Chromadorea    |
|            |                     | DrPCP1          | XP_005161758           | Paracaspase PCP1                   | Danio reio                    | Animalia        | Chordata      | Actinopterygii |
|            |                     | DrPCP2          | XP_699905.5            | Paracaspase PCP2                   | Danio reio                    | Animalia        | Chordata      | Actinopterygii |
|            |                     | DrPCP3          | XP_005165669           | Paracaspase PCP3                   | Danio reio                    | Animalia        | Chordata      | Actinopterygii |
|            |                     | HvPCP1          | XP_002158339.1         |                                    | Hydra vulgaris                | Animalia        | Cnidaria      | Anthozoa       |
|            |                     | NvPCP1          | XP_001629506.1         | Paracaspase 1                      | Nematostella vectensis        | Animalia        | Cnidaria      | Anthozoa       |
|            |                     | NvPCP2          | XP_001629519           | Paracaspase 2                      | Nematostella vectensis        | Animalia        | Cnidaria      | Anthozoa       |
|            | Paracaspase type II | NvPCP3          | XP_001629517.1         | Paracaspase 3                      | Nematostella vectensis        | Animalia        | Cnidaria      | Anthozoa       |
|            |                     | ShPCP1          | XP_007298416.1         |                                    | Stereum hirsutum FP-91666 SS1 | Fungi           | Basidiomycota | Agaricomycetes |
| DdPCP1     |                     | AAG38592.1      | Paracsapase 1          | Dyctiostelium discodeum            | Protozoa                      | Amoebozoa       | Dictyostelia  |                |
| DdPCP2     |                     | XP_642523.1     | Paracsapase 2          | Dyctiostelium discodeum            | Protozoa                      | Amoebozoa       | Dictyostelia  |                |
| MbMC1      | KUK73427.1          | C14 peptidase 1 | Methanobacterium sp    | Archaea                            | Euryarchaeota                 | Methanobacteria |               |                |
| Cb C14.1   | WP_026093724.1      | C14 peptidase 1 | Calothrix sp. PCC 7103 | Bacteria                           | Cyanobacteria                 | Cyanophyceae    |               |                |

Metacaspase type I

|          |                          |                 |                                 |          |                |                            |
|----------|--------------------------|-----------------|---------------------------------|----------|----------------|----------------------------|
| Ma C14.1 | WP_002745414.1           | C14 peptidase 1 | Microcystis aeruginosa          | Bacteria | Cyanobacteria  | Cyanophyceae               |
| LspC14.1 | WP_051926071.1           | C14 peptidase 1 | Leptolyngbya sp. JSC-1          | Bacteria | Cyanobacteria  | Cyanophyceae               |
| TbMC1    | CAD24802.1               | Metacaspase 1   | Trypanosoma brucei              | Protista | Euglenozoa     | Kinetoplastea              |
| TbMC2    | AAX80349.1               | Metacaspase 2   | Trypanosoma brucei              | Protista | Euglenozoa     | Kinetoplastea              |
| TbMC3    | AAX80348.1               | Metacaspase 3   | Trypanosoma brucei              | Protista | Euglenozoa     | Kinetoplastea              |
| TbMC4    | XP_822497.1              | Metacaspase 4   | Trypanosoma brucei              | Protista | Euglenozoa     | Kinetoplastea              |
| TbMC5    | CAD55946.1               | Metacaspase 5   | Trypanosoma brucei              | Protista | Euglenozoa     | Kinetoplastea              |
| ScMC1    | EDN63533.1               | YCA1            | Saccharomyces cerevisiae YJM789 | Fungi    | Ascomycota     | Saccharomycotina           |
| AnMC1    | A2RB75.2                 | Metacaspase 1   | Aspergillus niger               | Fungi    | Ascomycota     | Eurotiomycetes             |
| PtMC1    | fgenes1_pg.C_chr_2000533 | Metacaspase 1   | Phaedactylum tricorutum         | Plantae  | Heterokonta    | Phaeophyceae (Brown algae) |
| PtMC3    | phatr1_ua_kg.chr_8000029 | Metacaspase 3   | Phaedactylum tricorutum         | Plantae  | Heterokonta    | Phaeophyceae (Brown algae) |
| CcMC3    | Metacaspase 3            | XP_005710904.1  | Chondrus crispus                | Plantae  | Rodophyta      | Florideophyceae            |
| CcMC1    | Metacaspase 1            | XP_005717184.1  | Chondrus crispus                | Plantae  | Rodophyta      | Florideophyceae            |
| PhMC1    | AMB37187.1               | Metacaspase 1   | Pyropia haitanensis             | Plantae  | Rhodophyta     | Bangiophyceae              |
| CrMc1    | Cre03.g184700.t1.2.p     | Metacaspase 1   | Chlamydomonas reinhardtii       | Plantae  | Chlorophyta    | Chlorophyceae              |
| CrMc2    | Cre12.g517451.t1.1.p     | Metacaspase 2   | Chlamydomonas reinhardtii       | Plantae  | Chlorophyta    | Chlorophyceae              |
| VcMc1    | Vocar.0006s0350.1.p      | Metacaspase 1   | Volvox carteri                  | Plantae  | Chlorophyta    | Chlorophyceae              |
| VcMc2    | Vocar.0015s0233.1.p      | Metacaspase 2   | Volvox carteri                  | Plantae  | Chlorophyta    | Chlorophyceae              |
| PpMc2    | Pp3c17_17780V3.10.p      | Metacaspase 2   | Physcomitrella patens           | Plantae  | Bryophyta      | Bryopsida                  |
| PpMc5    | Pp3c24_11630V3.1.p       | Metacaspase 5   | Physcomitrella patens           | Plantae  | Bryophyta      | Bryopsida                  |
| SmMc1    | 104974                   | Metacaspase 1   | Selaginella moellendorffii      | Plantae  | Lycopodiophyta | Isoetopsida                |
| PaMC1    | MA_183122g0010           | Metacaspase 1   | Picea abies                     | Plantae  | Gymnosperms    | Pinopsida                  |
| PaMC5    | MA_10430487g0010         | Metacaspase 8   | Picea abies                     | Plantae  | Gymnosperms    | Pinopsida                  |
| AtMC1    | NP_171719                | Metacaspase 1   | Arabidopsis thaliana            | Plantae  | Angiosperms    | Magnoliopsida              |

|        |                    |                |                              |         |             |                 |
|--------|--------------------|----------------|------------------------------|---------|-------------|-----------------|
| AtMC2  | NP_001031711.1     | Metacaspase 2  | <i>Arabidopsis thaliana</i>  | Plantae | Angiosperms | Magnoliopsida   |
| AtMC3  | NP_851262.1        | Metacaspase 3  | <i>Arabidopsis thaliana</i>  | Plantae | Angiosperms | Magnoliopsida   |
| VvMC1  | AGJ94048.1         | Metacaspase 1  | <i>Vitis vinifera</i>        | Plantae | Angiosperms | Magnoliopsida   |
| VvMC2  | AGJ94049.1         | Metacaspase 2  | <i>Vitis vinifera</i>        | Plantae | Angiosperms | Magnoliopsida   |
| VvMC3  | AGJ94050.1         | Metacaspase 3  | <i>Vitis vinifera</i>        | Plantae | Angiosperms | Magnoliopsida   |
| VvMC6  | AGJ94053.1         | Metacaspase 6  | <i>Vitis vinifera</i>        | Plantae | Angiosperms | Magnoliopsida   |
| OsMC2  | LOC_Os03g27120.1   | Metacaspase 2  | <i>Oryza sativa</i>          | Plantae | Angiosperms | Liliopsida      |
| OsMC3  | LOC_Os03g27170.1   | Metacaspase 3  | <i>Oryza sativa</i>          | Plantae | Angiosperms | Liliopsida      |
| OsMC4  | LOC_Os03g27190.1   | Metacaspase 4  | <i>Oryza sativa</i>          | Plantae | Angiosperms | Liliopsida      |
| OsMC5  | LOC_Os03g27210.1   | Metacaspase 5  | <i>Oryza sativa</i>          | Plantae | Angiosperms | Liliopsida      |
| OsMC8  | LOC_Os11g04010.1   | Metacaspase 8  | <i>Oryza sativa</i>          | Plantae | Angiosperms | Liliopsida      |
| ZmMc1  | GRMZM2G022799_P01  | Metacaspase 1  | <i>Zea mays</i>              | Plantae | Angiosperms | Liliopsida      |
| ZmMc4  | GRMZM2G120069_P01  | Metacaspase 4  | <i>Zea mays</i>              | Plantae | Angiosperms | Liliopsida      |
| ZmMc5  | GRMZM2G120079_P01  | Metacaspase 5  | <i>Zea mays</i>              | Plantae | Angiosperms | Liliopsida      |
| ZmMc6  | GRMZM2G125314_P01  | Metacaspase 6  | <i>Zea mays</i>              | Plantae | Angiosperms | Liliopsida      |
| ZmMc7  | GRMZM2G132238_P01  | Metacaspase 7  | <i>Zea mays</i>              | Plantae | Angiosperms | Liliopsida      |
| ZmMc8  | GRMZM2G155422_P01  | Metacaspase 8  | <i>Zea mays</i>              | Plantae | Angiosperms | Liliopsida      |
| ZmMc9  | GRMZM2G320206_P01  | Metacaspase 9  | <i>Zea mays</i>              | Plantae | Angiosperms | Liliopsida      |
| ZmMc10 | GRMZM2G337548_P01  | Metacaspase 10 | <i>Zea mays</i>              | Plantae | Angiosperms | Liliopsida      |
| ZmMc11 | GRMZM2G382581_P01  | Metacaspase 11 | <i>Zea mays</i>              | Plantae | Angiosperms | Liliopsida      |
| CcMC2  | XP_005713893.1     | Metacaspase 2  | <i>Chondrus crispus</i>      | Plantae | Rodophyta   | Florideophyceae |
| PpMc1  | Pp3c1_20330V3.1.p  | Metacaspase 1  | <i>Physcomitrella patens</i> | Plantae | Bryophyta   | Bryopsida       |
| PpMc3  | Pp3c21_16610V3.1.p | Metacaspase 3  | <i>Physcomitrella patens</i> | Plantae | Bryophyta   | Bryopsida       |

|                      |                   |                                      |               |                            |             |                |                                    |
|----------------------|-------------------|--------------------------------------|---------------|----------------------------|-------------|----------------|------------------------------------|
| Metacaspase type II  | PpMc4             | Pp3c2_20840V3.1.p                    | Metacaspase 4 | Physcomitrella patens      | Plantae     | Bryophyta      | Bryopsida                          |
|                      | SmMc2             | 152567                               | Metacaspase 2 | Selaginella moellendorffii | Plantae     | Lycopodiophyta | Isoetopsida                        |
|                      | SmMc3             | 430194                               | Metacaspase 3 | Selaginella moellendorffii | Plantae     | Lycopodiophyta | Isoetopsida                        |
|                      | PaMC2             | MA_10433349g0010                     | Metacaspase 2 | Picea abies                | Plantae     | Gymnosperms    | Pinopsida                          |
|                      | PaMC3             | MA_10430708g0010                     | Metacaspase 3 | Picea abies                | Plantae     | Gymnosperms    | Pinopsida                          |
|                      | PaMC4             | MA_939400g0010                       | Metacaspase 4 | Picea abies                | Plantae     | Gymnosperms    | Pinopsida                          |
|                      | AtMC4             | NP_178052.1                          | Metacaspase 4 | Arabidopsis thaliana       | Plantae     | Angiosperms    | Magnoliopsida                      |
|                      | AtMC5             | AEE36231.1                           | Metacaspase 5 | Arabidopsis thaliana       | Plantae     | Angiosperms    | Magnoliopsida                      |
|                      | AtMC6             | AEE36230.1                           | Metacaspase 6 | Arabidopsis thaliana       | Plantae     | Angiosperms    | Magnoliopsida                      |
|                      | AtMC7             | AEE36229.1                           | Metacaspase 7 | Arabidopsis thaliana       | Plantae     | Angiosperms    | Magnoliopsida                      |
|                      | AtMC8             | NP_173092.1                          | Metacaspase 8 | Arabidopsis thaliana       | Plantae     | Angiosperms    | Magnoliopsida                      |
|                      | AtMC9             | AED90710.1                           | Metacaspase 9 | Arabidopsis thaliana       | Plantae     | Angiosperms    | Magnoliopsida                      |
|                      | VvMC4             | AGJ94051.1                           | Metacaspase 4 | Vitis vinifera             | Plantae     | Angiosperms    | Magnoliopsida                      |
|                      | VvMC5             | AGJ94052.1                           | Metacaspase 5 | Vitis vinifera             | Plantae     | Angiosperms    | Magnoliopsida                      |
|                      | OsMC1             | LOC_Os01g58580.1                     | Metacaspase 1 | Oryza sativa               | Plantae     | Angiosperms    | Liliopsida                         |
|                      | OsMC6             | LOC_Os05g41660.1                     | Metacaspase 6 | Oryza sativa               | Plantae     | Angiosperms    | Liliopsida                         |
|                      | OsMC7             | LOC_Os05g41670.1                     | Metacaspase 7 | Oryza sativa               | Plantae     | Angiosperms    | Liliopsida                         |
| ZmMc2                | GRMZM2G047274_P01 | Metacaspase 2                        | Zea mays      | Plantae                    | Angiosperms | Liliopsida     |                                    |
| ZmMc3                | GRMZM2G066041_P01 | Metacaspase 3                        | Zea mays      | Plantae                    | Angiosperms | Liliopsida     |                                    |
| Metacaspase type III | PtMC2             | estExt_fgenes1_pg.C_c<br>hr_160138   | Metacaspase 2 | Phaeodactylum tricorutum   | Plantae     | Heterokonta    | Bacillariophyceae<br>(Brown algae) |
|                      | PtMC4             | estExt_Phatr1_ua_kg.C_<br>chr_160040 | Metacaspase 4 | Phaeodactylum tricorutum   | Plantae     | Heterokonta    | Bacillariophyceae<br>(Brown algae) |
|                      | PtMC5             | estExt_Phatr1_ua_kg.C_<br>chr_160041 | Metacaspase 5 | Phaeodactylum tricorutum   | Plantae     | Heterokonta    | Bacillariophyceae<br>(Brown algae) |
|                      | EsMC1             | CBN76943.1                           | Metacaspase 1 | Ectocarpus siliculosus     | Plantae     | Heterokonta    | Phaeophyceae<br>(Brown algae)      |
